# Supplementary material for: Instrumented assessment of motor function in dyskinetic cerebral palsy: a systematic review
Source: PubMed Central journal article supplement (PMC7057465; doi:10.1186/s12984-020-00658-6), 2020-03-05
Supplement: 12984_2020_658_MOESM1_ESM.pdf [file 12984_2020_658_MOESM1_ESM.pdf]

## Additional file 1: Search strategy

Date of searches: **26-11-2019**

### Databases:

|                                                      |        |
|------------------------------------------------------|--------|
| PubMed                                               | : 1504 |
| Embase.com                                           | : 2415 |
| Scopus                                               | : 3404 |
| <br>                                                 |        |
| Totaal                                               | : 7323 |
| Additional records identified through other sources: | : 4    |
| Totaal na ontdubbelen                                | : 4537 |

### PubMed:

#### **#1 Cerebrale parese, dyskinesias & kinderen**

("Cerebral Palsy"[Mesh] OR CP[tiab] OR "Cerebral Palsy"[tiab] OR "Cerebral Palsies"[tiab])

#### **#2 Dyskinesias**

("Dyskinesias"[Mesh:NoExp] OR "Athetosis"[Mesh] OR "Chorea"[Mesh:NoExp] OR "Dystonia"[Mesh:NoExp] OR dyskine\*[tiab] OR diskine\*[tiab] OR dycine\*[tiab] OR atheto\*[tiab] OR dystonia[tiab] OR athetoid[tiab] OR "abnormal involuntary movement"[tiab])

#### **#3 children 6-24 (child, adolescent, young adult)**

"Young adult"[mesh] OR "Child"[mesh] OR "Minors"[mesh] OR "Adolescent"[mesh] OR child\*[tw] OR adolescen\*[tw] OR pediatric\*[tw] OR paediatric\*[tw] OR pube\*[tw] OR juvenil\*[tw] OR school\*[tw] OR boy[tw] OR boys[tw] OR girl[tw] OR girls[tw] OR youth[tw] OR youths[tw] OR teen[tw] OR teens[tw] OR teenager\*[tw] OR prepube\*[tiab] OR preadolescen\*[tiab] OR young\*[tiab]

#### **#4 instrumented measurements**

"Biomechanical Phenomena"[Mesh:NoExp] OR "Biomedical Technology Assessment"[Mesh] OR "Accelerometry"[Mesh] OR "Ambulatory Monitoring"[Mesh] OR "Torque"[Mesh] OR "Kinetics"[Mesh] OR "Electromyography"[Mesh] OR "Video recording"[Mesh:NoExp] OR "Videotape Recording"[Mesh] OR "Computers, Handheld"[Mesh] OR torque\*[tiab] OR biomechani\*[tiab] OR Kinematic\*[tiab] OR kinetic\*[tiab] OR angle\*[tiab] OR force\*[tiab] OR motion[tiab] OR acceler\*[tiab] OR rotation[tiab] OR velocity[tiab] OR velocities[tiab] OR speed[tiab] OR overflow[tiab] OR spatiotemporal[tiab] OR temporal-spatial[tiab] OR electromyo\*[tiab] OR EMG[tiab] OR 3D[tiab] OR three-dimensional[tiab] OR sensor[tiab] OR sensors[tiab] OR wearable[tiab] OR computer\*[tiab] OR robot\*[tiab] OR electrophysiolog\*[tiab] OR video[tiab] OR videotap\*[tiab] OR videorec\*[tiab] OR camera[tiab] OR GPS[tiab] OR I-pad[tiab] OR iPad[tiab] OR gyroscope[tiab] OR signal\*[tiab] OR smart phone\*[tiab] OR smartphone\*[tiab] OR mobile phone\*[tiab]

((#1 AND #2) OR (#2 AND #3)) AND #4

**EMBASE.com:**

**#1 Cerebrale parese, dyskinesias & kinderen**

'cerebral palsy'/exp OR CP:ti,ab OR 'Cerebral Palsy':ti,ab OR 'Cerebral Palsies':ti,ab

**#2 Dyskinesias**

'dyskinesia'/de OR 'athetosis'/exp OR 'chorea'/de OR 'dystonia'/exp OR dyskine\*:ti,ab OR diskine\*:ti,ab OR dycine\*:ti,ab OR atheto\*:ti,ab OR dystonia:ti,ab OR athetoid:ti,ab OR 'abnormal involuntary movement':ti,ab

**#3 children 6-24 (child, adolescent, young adult)**

'young adult'/exp OR 'child'/de OR 'school child'/exp OR 'boy'/exp OR 'girl'/exp OR 'adolescent'/exp OR child\*:ti,ab OR adolescen\*:ti,ab OR pediatric\*:ti,ab OR paediatric\*:ti,ab OR pube\*:ti,ab OR juvenil\*:ti,ab OR school\*:ti,ab OR boy:ti,ab OR boys:ti,ab OR girl:ti,ab OR girls:ti,ab OR youth:ti,ab OR youths:ti,ab OR teen:ti,ab OR teens:ti,ab OR teenager\*:ti,ab OR prepube\*:ti,ab OR preadolescen\*:ti,ab OR young\*:ti,ab

**#4 instrumented measurements**

'biomechanics'/exp OR 'biomedical technology assessment'/exp OR 'accelerometry'/exp OR 'ambulatory monitoring'/exp OR 'torque'/exp OR 'kinetics'/de OR 'velocity'/exp OR 'electromyography'/exp OR 'videorecording'/exp OR 'personal digital assistant'/exp OR 'mobile phone'/exp OR 'wearable computer'/exp OR 'tablet computer'/exp OR torque\*:ti,ab OR biomechani\*:ti,ab OR Kinematic\*:ti,ab OR kinetic\*:ti,ab OR angle\*:ti,ab OR force\*:ti,ab OR motion:ti,ab OR acceler\*:ti,ab OR rotation:ti,ab OR velocity:ti,ab OR velocities:ti,ab OR speed:ti,ab OR overflow:ti,ab OR spatiotemporal:ti,ab or 'temporal-spatial':ti,ab OR electromyo\*:ti,ab OR EMG:ti,ab OR 3D:ti,ab OR 'three-dimensional':ti,ab OR sensor:ti,ab OR sensors:ti,ab OR wearable:ti,ab OR computer\*:ti,ab OR robot\*:ti,ab OR electrophysiolog\*:ti,ab OR video:ti,ab OR videotap\*:ti,ab OR videorec\*:ti,ab OR camera:ti,ab OR GPS:ti,ab OR 'I-pad':ti,ab OR iPad:ti,ab OR gyroscope:ti,ab OR signal\*:ti,ab OR 'smart phone\*':ti,ab OR smartphone\*:ti,ab OR 'mobile phone\*':ti,ab OR iphone\*:ti,ab

((#1 AND #2) OR (#2 AND #3)) AND #4

**Scopus:**

**#1 Cerebrale parese, dyskinesias & kinderen**

CP OR "Cerebral Palsy" OR "Cerebral Palsies"

**#2 Dyskinesias**

dyskine\* OR diskine\* OR dyscine\* OR atheto\* OR dystonia OR athetoid OR "abnormal involuntary movement"

**#3 children 6-24 (child, adolescent, young adult)**

child\* OR adolescen\* OR pediatric\* OR paediatric\* OR pube\* OR juvenil\* OR school\* OR boy OR boys OR girl OR girls OR youth OR youths OR teen OR teens OR teenager\* OR prepube\* OR preadolescen\* OR young\*

**#4 instrumented measurements**

torque\* OR biomechani\* OR Kinematic\* OR kinetic\* OR angle\* OR force\* OR motion OR acceler\* OR rotation OR velocity OR velocities OR speed OR overflow OR spatiotemporal OR "temporal-spatial" OR electromyo\* OR EMG OR 3D OR "three-dimensional" OR sensor OR sensors OR wearable OR computer\* OR robot\* OR electrophysiolog\* OR video OR videotap\* OR videorec\* OR camera OR GPS OR "i-pad" OR iPad OR gyroscope OR signal\* OR smartphone\* OR "smart phone\*" OR "mobile phone" OR iphone\* ( torque\* OR biomechani\* OR kinematic\* OR kinetic\* OR angle\* OR force\* OR motion OR acceler\* OR rotation OR velocity OR velocities OR speed OR overflow OR spatiotemporal OR "temporal-spatial" OR electromyo\* OR emg) OR (3d OR "three-dimensional" OR sensor OR sensors OR wearable OR computer\* OR robot\* OR electrophysiolog\* OR video OR videotap\* OR videorec\* OR camera OR gps OR "i-pad" OR ipad OR gyroscope OR signal\*) OR (smartphone\* OR "smart phone\*" OR "mobile phone" OR iphone\*)
