# Supplementary material for: Instrumented assessment of motor function in dyskinetic cerebral palsy: a systematic review
Source: PubMed Central journal article supplement (PMC7057465; doi:10.1186/s12984-020-00658-6), 2020-03-05
Supplement: 12984_2020_658_MOESM3_ESM.pdf [file 12984_2020_658_MOESM3_ESM.pdf]

**Additional file 3: Overview of studies that report correlation of parameters to a clinical comparator instrument**

|                      | <i>Measured parameters</i>                                                                                                                                                                                             | <i>Comparator instrument</i>                                                                                                                                                                                                                                             | <i>Correlation</i>                                          | <i>p-value</i>                                                 |
|----------------------|------------------------------------------------------------------------------------------------------------------------------------------------------------------------------------------------------------------------|--------------------------------------------------------------------------------------------------------------------------------------------------------------------------------------------------------------------------------------------------------------------------|-------------------------------------------------------------|----------------------------------------------------------------|
| Abel, 2003 (39)      | -Variability of ankle trajectory during swing                                                                                                                                                                          | -Visual analog scale rating of swing variability                                                                                                                                                                                                                         | r=0.79                                                      | p<0.001                                                        |
| Young, 2011 (47)     | -Co-contraction (% of MVC)                                                                                                                                                                                             | -Co-contraction correlation to BADS arm                                                                                                                                                                                                                                  | r=0.68                                                      | p<0.001                                                        |
| Gordon, 2006 (51)    | -Kinematic overflow<br>-Peak velocity<br>-Curvature of path<br>-Hold distance<br>-End point error                                                                                                                      | -Kinematic overflow correlation to BADS<br>-Peak velocity correlation to BADS<br>-Curvature of the path correlation to BADS<br>-Hold distance correlation to BADS<br>-End point error correlation to BADS                                                                | r=0.75<br>r=0.35<br>r=0.70<br>r=0.39<br>r=-0.65             | p<0.005<br>p=0.24<br>p=0.008<br>p=0.19<br>p=0.02               |
| Butler, 2010 (52)    | -Movement time<br>-Index of curvature during reach<br>-Number of movement units during the reach, transport to mouth and total (i.e. number of acceleration-decelerations in the velocity profile of the wrist marker) | -Movement time correlation to MACS level<br>- Index of curvature correlation to MACS level<br>-Number of movement units during reach to MACS level<br>-Number of movement units during transport to mouth to MACS level<br>-Total number of movement units to MACS level | rho=0.96<br>rho=0.87<br>rho=0.91<br>rho=0.78,<br>rho=0.91,  | p<0.001<br>p<0.001<br>p<0.001<br>p=0.003<br>p<0.001            |
| Butler, 2012 (53)    | -Peadiatric Upper Limb Motion Index (PULMI)                                                                                                                                                                            | -Peadiatric Upper Limb Motion Index (PULMI) correlation to MACS level                                                                                                                                                                                                    | rho=-0.78                                                   | p<0.0001 (in whole CP group)                                   |
| De Campos, 2014 (55) | -Intralimb coordination: shoulder flexion/elbow extension correlation<br>-Reach time<br>-Hand orientation error<br>-Hold time                                                                                          | -Shoulder flexion/elbow extension correlation to BFMDRS arm<br>-Reach time correlation to BFMDRS arm,<br>-Hand orientation error correlation to BFMDRS arm<br>-Hold time correlation to BFMDRS arm:                                                                      | rho=0.64<br>rho=0.81<br>rho= 0.45<br>rho=0.85;              | p=0.013<br>p<0.001<br>p=n.s.<br>p<0.001                        |
| Kukke, 2016 (56)     | -Atypical kinematics score (global score to summarize deviations from typical movement)                                                                                                                                | -Atypical kinematic score correlation to BFMDRS arm;                                                                                                                                                                                                                     | rho=0.70                                                    | p<0.0001                                                       |
| Sanger, 2006 (58)    | -Signal-to-noise ratio (ratio of first principal component of the joint velocity time serie to the sum of the remaining 10 components)                                                                                 | -Signal-to-noise ratio correlation to BADS arm to BFMDRS arm to UDRS arm                                                                                                                                                                                                 | r=0.82                                                      | p=n.s.<br>p=n.s.<br>p<0.004                                    |
| Malfait, 2007 (59)   | -Co-contraction<br>-Duration of pause phase                                                                                                                                                                            | -Co-contraction correlation to BADS arm, to BFMDRS arm to UDRS arm<br>,<br>-Duration of pause correlation to BADS to BFMDRS to UDRS                                                                                                                                      | r=0.44<br>r=0.20<br>r=0.23<br>r=0.57<br>r=0.64<br>r=0.71    | p=0.326<br>p=0.666<br>p=0.618<br>p=0.177<br>p=0.123<br>p=0.074 |
| Pons, 2017 (60)      | -Index of dystonia (kinematic measure of overflow)<br>-Target accuracy                                                                                                                                                 | -Index of dystonia correlation to BFMDRS arm<br>-Target accuracy correlation to BFMDRS arm                                                                                                                                                                               | r=0.82                                                      | p=0.02<br>p=n.s.                                               |
| Kawamura, 2012 (61)  | -Kinematic dystonia measure (kinematic overflow: summation of joint angle movement of wrist, elbow and shoulder)                                                                                                       | -Kinematic dystonia measure during hand tapping correlation to BADS total: to BADS arm to QUEST<br>-Kinematic dystonia measure during eye blinking correlation (after outlier removal) to BADS total:, to BADS arm to QUEST                                              | r=0.79<br>r=0.76<br>r= -0.60<br>r=0.41<br>r=0.72<br>r=-0.17 | p=0.003<br>p=0.007<br>p=0.05<br>p=0.24<br>p=0.02<br>p=0.63     |
| Legros, 2004 (62)    | -Integral/area under the curve of acceleration power spectrum during rest and posture                                                                                                                                  | -Integral under the curve during rest correlation to BFMDRS to BFMDRS arm<br>-Integral under the cure during posture to BFMDRS: to BFMDRS arm                                                                                                                            | rho=0.58                                                    | p<0.01<br>p=n.s.<br>p=n.s.<br>p=n.s.                           |
| Bertuccio, 2014 (69) | -Movement time<br>-Throughput (ratio of index of difficulty to movement time calculated by Fitts' Law)                                                                                                                 | -Movement time correlation to BADS arm<br>-Throughput correlation to BADS arm,                                                                                                                                                                                           | r =0.33<br>r=0.28                                           | p<0.05<br>p<0.05                                               |
| Young, 2011 (71)     | -Tracking error<br>-Overflow (sEMG)                                                                                                                                                                                    | -Tracking error correlation to BADS arm<br>-Overflow (sEMG) correlation to BADS arm,                                                                                                                                                                                     | r=0.73<br>r=0.56                                            | p<0.001<br>p<0.001                                             |
| Young, 2013 (72)     | -Tracking error<br>-Overflow (sEMG)                                                                                                                                                                                    | -Tracking error correlation to BADS arm,<br>-Overflow (sEMG) correlation to BADS arm,                                                                                                                                                                                    | r=0.28<br>r=0.28                                            | p=not rep.<br>p=not rep.                                       |
| Young, 2014 (73)     | -Tracking error<br>-Overflow (sEMG)                                                                                                                                                                                    | -Tracking error correlation to BADS arm<br>-Overflow (sEMG) correlation to BADS arm,                                                                                                                                                                                     | r=0.59<br>r=0.50                                            | p= not rep.<br>p= not rep..                                    |

BADS= Barry-Albright Dystonia scale ;BFMDRS = Burke-Fahn-Marsden Dystonia Rating Scale; MACS= Manual Ability Classification System ; QUEST=Quality of Upper Extremity Skills Test score; UDRS=Unified Dystonia Rating Scale; n.s.=not significant; not rep.=not reported
