# Supplementary material for: Instrumented assessment of motor function in dyskinetic cerebral palsy: a systematic review
Source: PubMed Central journal article supplement (PMC7057465; doi:10.1186/s12984-020-00658-6), 2020-03-05
Supplement: 12984_2020_658_MOESM5_ESM.pdf [file 12984_2020_658_MOESM5_ESM.pdf]

**Additional file 5 : Overview of studies that report on reliability assessment**

|                     | <i>Construct measured</i>                                                                                                                                                                                                                             | <i>Type</i>                                                | <i>ICCs/Correlation</i>                                                                                                                                              | <i>SEM, SDC or LoA</i>                                                                    |
|---------------------|-------------------------------------------------------------------------------------------------------------------------------------------------------------------------------------------------------------------------------------------------------|------------------------------------------------------------|----------------------------------------------------------------------------------------------------------------------------------------------------------------------|-------------------------------------------------------------------------------------------|
| Butler, 2012 (53)   | -Movement time<br>-Index of curvature during reach<br>-Number of movement units during the Reach & Gasp cycle<br>-Angular velocity of elbow extension<br>-Ratio of the peak velocity during two phases<br>-Peadiatric Upper Limb Motion Index (PULMI) | Intra-session reliability                                  | Correlation all variables between two trials in dyskinetic CP rho=0.70-0.96, p<0.001                                                                                 | Not reported                                                                              |
| Kawamura, 2012 (61) | -Kinematic dystonia measure                                                                                                                                                                                                                           | Test-retest reliability (30 minutes later on the same day) | Hand-tapping task: ICC=0.95 (95% CI: 0.82, 0.99)<br>Eye blinking task: ICC=0.74 (95% CI:0.03, 0.93) (due to one outlier) after removal: ICC=0.96 (95% CI:0.82, 0.99) | Hand-tapping task: LoA: ±80 degree<br>Eye blinking task: ±250 degree (due to one outlier) |
| Legros, 2004 (62)   | -Area under the curve of acceleration power spectrum during rest and posture                                                                                                                                                                          | Test-retest reliability                                    | Correlation between first and second recording for rest and posture rho=0.97, p<0.05                                                                                 | Not reported                                                                              |
| Nwaobi, 1987 (66)   | -Movement time                                                                                                                                                                                                                                        | Intra-session reliability<br>Test-retest reliability       | Statistics not adequately reported                                                                                                                                   | Not reported                                                                              |

ICCs= intraclass correlation coefficients; SEM= Standard error of measurement; SDC= smallest detectable difference; LoA= limits of agreement
