# Supplementary material for: Instrumented assessment of motor function in dyskinetic cerebral palsy: a systematic review
Source: PubMed Central journal article supplement (PMC7057465; doi:10.1186/s12984-020-00658-6), 2020-03-05
Supplement: 12984_2020_658_MOESM7_ESM.pdf [file 12984_2020_658_MOESM7_ESM.pdf]

**Additional file 7: Table S3: Characteristics of included studies (assessed body region, assessed ICF-CY categories, used instruments and technologies and measured parameters)**

| First author, year     | Assessed body region               | Assessed ICF-CY categories                                                                                        | Instruments / Technologies                                                                        | Measured parameters                                                                                                                                                                                                                                                                                                                        | GMFCS amb. / non amb. | MACS | Comparison     |                       | Pre/post intervention | Reliability |
|------------------------|------------------------------------|-------------------------------------------------------------------------------------------------------------------|---------------------------------------------------------------------------------------------------|--------------------------------------------------------------------------------------------------------------------------------------------------------------------------------------------------------------------------------------------------------------------------------------------------------------------------------------------|-----------------------|------|----------------|-----------------------|-----------------------|-------------|
|                        |                                    |                                                                                                                   |                                                                                                   |                                                                                                                                                                                                                                                                                                                                            |                       |      | between groups | with clinical measure |                       |             |
| Andrews, 2015 (36)     | Lower extremity                    | -Muscle tone / Motor reflex function                                                                              | -sEMG<br>-6DOF single position sensor<br>-Force sensor-                                           | -Knee ROM<br>-Angular peak velocity<br>-Angular peak acceleration<br>-EMG data                                                                                                                                                                                                                                                             | ✗                     | ✗    | ✗              | ✗                     | ✗                     | ✗           |
| Beattie, 2016 (37)     | Lower extremity                    | -Muscle tone / Motor reflex function                                                                              | -sEMG<br>-Video                                                                                   | -Mean number of active muscles during rest, quick stretch and volitional movement                                                                                                                                                                                                                                                          | I-III                 | ✗    | ✓              | ✗                     | ✗                     | ✗           |
| Lebiedowska, 2004 (38) | Lower extremity                    | -Muscle power function<br>-Muscle tone / Motor reflex function<br>-Gait pattern function<br>-Walking              | -sEMG<br>-Electrogoniometer<br>-Force platforms<br>-3D motion capture system<br>-Force transducer | -Maximum voluntary isometric knee flexion and extension torques<br>-Co-contraction of antagonist during knee flexion and extension<br>-Knee tendon reflexes<br>-Resistance of knee joint during slow passive movement<br>-Torque of catch<br>-Kinematic gait parameters in the sagittal plane of knee range of motion<br>-Walking velocity | amb.                  | ✗    | ✓              | ✗                     | ✗                     | ✗           |
| Abel, 2003 (39)        | Lower extremity                    | -Gait pattern                                                                                                     | -3D motion capture system                                                                         | -Variability of ankle trajectory during swing                                                                                                                                                                                                                                                                                              | amb.                  | ✗    | ✓              | ✓                     | ✗                     | ✗           |
| Davids, 1999 (40)      | Lower extremity                    | -Gait pattern                                                                                                     | -3D motion capture system                                                                         | -Normalized dynamic base of support (step width)<br>-Step profile Step length/step width<br>-Total body maximal lateral acceleration                                                                                                                                                                                                       | amb.                  | ✗    | ✓              | ✗                     | ✗                     | ✗           |
| Petrarca, 2017 (41)    | Lower extremity                    | -Gait pattern                                                                                                     | -3D motion capture system                                                                         | -Kinematic data<br>-Movement pattern during gait and jumping                                                                                                                                                                                                                                                                               | amb.                  | ✗    | ✗              | ✗                     | ✗                     | ✗           |
| Sangeux, 2016 (42)     | Lower extremity                    | -Gait pattern                                                                                                     | -3D motion capture system                                                                         | -Variability of kinematic data – Overall Gait Variability Measure (OGVM)                                                                                                                                                                                                                                                                   | I-III                 | ✗    | ✓              | ✗                     | ✗                     | ✗           |
| Berg, 1969 (43)        | Lower extremity<br>Upper extremity | -Control of voluntary movement function                                                                           | -sEMG<br>-Needle EMG                                                                              | -Level of EMG activity during rest and activity<br>-Frequency spectrum                                                                                                                                                                                                                                                                     | amb.& non amb         | ✗    | ✗              | ✗                     | ✓                     | ✗           |
| Kukke, 2011 (44)       | Upper extremity                    | -Muscle tone / Motor reflex function<br>-Control of voluntary movement function<br>-Involuntary movement function | -sEMG<br>-Jointed elbow brace belt-driven by a strong motor<br>-Optical position encoder          | -Mean elbow extension velocity<br>-Peak elbow extension velocity<br>-Mean triceps sEMG (overflow)<br>-Mean biceps sEMG                                                                                                                                                                                                                     | ✗                     | ✗    | ✓              | ✗                     | ✗                     | ✗           |

**Table 3 (continued):**

| First author, year     | Assessed body region | Assessed ICF-CY categories                                                | Instruments / Technologies                                                                                                                                                                    | Measured parameters                                                                                                                                                                                                                                                                         | GMFCS amb. / non amb. | MACS | Comparison     |                       | Pre/post inter-vention | Reliability |
|------------------------|----------------------|---------------------------------------------------------------------------|-----------------------------------------------------------------------------------------------------------------------------------------------------------------------------------------------|---------------------------------------------------------------------------------------------------------------------------------------------------------------------------------------------------------------------------------------------------------------------------------------------|-----------------------|------|----------------|-----------------------|------------------------|-------------|
|                        |                      |                                                                           |                                                                                                                                                                                               |                                                                                                                                                                                                                                                                                             |                       |      | between groups | with clinical measure |                        |             |
| Chu, 2009 (45)         | Upper extremity      | -Muscle power function                                                    | -Force loadcell<br>-Biodex chair with arm device                                                                                                                                              | -Force variability<br>-Signal dependence of noise (increase of variability with force level)                                                                                                                                                                                                | x                     | x    | ✓              | x                     | x                      | x           |
| Van Doornik, 2009 (46) | Upper extremity      | -Muscle tone / Motor reflex function                                      | -sEMG<br>-Force sensor<br>-Electrogoniometer<br>-Biodex chair<br>-Custom built apparatus to apply manual perturbations to elbow joint                                                         | -Correlation between elbow angle and sEMG activity<br>-sEMG activity during sinusoidal perturbation<br>-Dependency of EMG with velocity or position                                                                                                                                         | x                     | x    | x              | x                     | x                      | x           |
| Young, 2011 (47)       | Upper extremity      | -Control of voluntary movement function                                   | -Biodex chair<br>-Custom built apparatus to held shoulder abducted 90 degree and elbow flexed 90 degree<br>-sEMG<br>-Software to track a target by activating biceps and triceps              | -Co-contraction (% of MVC)<br>-Tracking error                                                                                                                                                                                                                                               | x                     | x    | ✓              | ✓                     | ✓                      | x           |
| Niku, 1985 (48)        | Upper extremity      | -Control of voluntary movement function<br>-Involuntary movement function | -Potentiometer<br>-Electrogoniometer<br>-Rigid and a flexible elbow brace<br>-Motion pattern generator, generating sinusoidal motions                                                         | -Movement frequency spectrum during:<br>*a visual tracking tests of sinusoidal motion<br>*a freewheeling test (move as fast as possible)                                                                                                                                                    | x                     | x    | ✓              | x                     | x                      | x           |
| Chu, 2013 (49)         | Upper extremity      | -Control of voluntary movement function                                   | -Manipulandum rotating around a single axis (elbow rotation on a table, movement restricted to horizontal plane),<br>-Optical position encoder<br>-Software: showing movement of shuffleboard | -Mean velocity<br>-Intrinsic variability (Standard deviation of maximum velocity)                                                                                                                                                                                                           | x                     | x    | ✓              | x                     | x                      | x           |
| Chu, 2016 (50)         | Upper extremity      | - Control of voluntary movement function                                  | -Manipulandum rotating around a single axis (elbow rotation on a table, movement restricted to horizontal plane)<br>-Optical position encoder<br>-Software: showing movement of bal           | -Performance error: distance error of virtual bal to target<br>-Reduction of performance error<br>-T- Cost (tolerance, costs with respect to optimal performance): Difference in mean error of location between the actual data and the ideal data<br>-Timing error<br>-Release time window | x                     | x    | ✓              | x                     | x                      | x           |

Table 3 (continued):

| First author, year | Assessed body region | Assessed ICF-CY categories                                                                                                             | Instruments / Technologies                              | Measured parameters                                                                                                                                                                                                                                                                                                                                                | GMFCS amb. / non amb. | MACS  | Comparison     |                       | Pre/post inter-vention | Reliability |
|--------------------|----------------------|----------------------------------------------------------------------------------------------------------------------------------------|---------------------------------------------------------|--------------------------------------------------------------------------------------------------------------------------------------------------------------------------------------------------------------------------------------------------------------------------------------------------------------------------------------------------------------------|-----------------------|-------|----------------|-----------------------|------------------------|-------------|
|                    |                      |                                                                                                                                        |                                                         |                                                                                                                                                                                                                                                                                                                                                                    |                       |       | between groups | with clinical measure |                        |             |
| Gordon, 2006 (51)  | Upper extremity      | -Muscle tone / Motor reflex function<br>-Control of voluntary movement function<br>-Involuntary movement function<br>-Hand and arm use | -sEMG<br>-Rigidty analyzer<br>-3D-motion capture system | -Total joint excursion (shoulder, elbow, wrist) of the resting arm (kinematic overflow)<br>Reaching performance:<br>-Peak velocity<br>-Wrist path ratio (curvature)<br>-End point error (overshoot or undershoot)<br>-Hold distance                                                                                                                                | ✗                     | ✗     | ✓              | ✓                     | ✗                      | ✗           |
| Butler, 2010 (52)  | Upper extremity      | -Control of voluntary movement function<br>-Lifting and carrying objects                                                               | -3D motion capture system                               | -Movement time<br>-Movement time of different phases of Reach & Grasp cyle (i.e. reach forward and grasp, transport to mouth, transport back and release)<br>-Index of curvature during reach<br>-Peak velocity<br>-Number of movement units during the Reach & Gasp cycle (i.e. number of acceleration–decelerations in the velocity profile of the wrist marker) | ✗                     | I-III | ✓              | ✓                     | ✗                      | ✗           |
| Butler, 2012 (53)  | Upper extremity      | -Control of voluntary movement function<br>-Lifting and carrying objects                                                               | -3D motion capture system                               | -Movement time<br>-Index of curvature during reach<br>-Number of movement units during the Reach & Gasp cycle (i.e. number of acceleration–decelerations in the velocity profile of the wrist marker)<br>-Angular velocity of elbow extension during reach<br>-Ratio of the peak velocity during two phases<br>-Peadiatric Upper Limb Motion Index (PULMI)         | ✗                     | I-III | ✓              | ✓                     | ✗                      | ✓           |
| Damiano, 2010 (54) | Upper extremity      | -Control of voluntary movement function<br>-Involuntary movement function<br>-Hand and arm use                                         | -3D motion capture system                               | -Reach velocity<br>-Path length<br>-Overflow to non-moving limb<br>-Ability to maintain a static arm posture                                                                                                                                                                                                                                                       | ✗                     | II-IV | ✓              | ✗                     | ✗                      | ✗           |

Table 3 (continued):

| First author, year   | Assessed body region | Assessed ICF-CY categories                                               | Instruments / Technologies         | Measured parameters                                                                                                                                                                                                                                                                                                                                                                                                                     | GMFCS amb. / non amb. | MACS  | Comparison     |                       | Pre/post intervention | Reliability |
|----------------------|----------------------|--------------------------------------------------------------------------|------------------------------------|-----------------------------------------------------------------------------------------------------------------------------------------------------------------------------------------------------------------------------------------------------------------------------------------------------------------------------------------------------------------------------------------------------------------------------------------|-----------------------|-------|----------------|-----------------------|-----------------------|-------------|
|                      |                      |                                                                          |                                    |                                                                                                                                                                                                                                                                                                                                                                                                                                         |                       |       | between groups | with clinical measure |                       |             |
| De Campos, 2014 (55) | Upper extremity      | -Control of voluntary movement function<br>-Lifting and carrying objects | -3D motion capture system          | -Intralimb coordination: shoulder flexion/elbow extension correlation<br>-Reach time<br>-Hold time<br>-Hand orientation error                                                                                                                                                                                                                                                                                                           | x                     | I-III | ✓              | ✓                     | x                     | x           |
| Kukke, 2016 (56)     |                      |                                                                          |                                    | -Hand aperture<br>-Movement time (between start of reach, hand-object contact time, object lift off time);<br>-Atypical kinematics score (global score to summarize deviations from typical movement)                                                                                                                                                                                                                                   | x                     | I-III | ✓              | ✓                     | x                     | x           |
| Elliott, 2011 (57)   | Upper extremity      | -Control of voluntary movement function<br>-Hand and arm use             | -3D motion capture system          | -Movement time<br>-Directness index (ratio of actual path versus shortest path)<br>-Normalized jerk<br>-% time in primary movement<br>-% normalised jerk in primary movement                                                                                                                                                                                                                                                            | x                     | x     | ✓              | x                     | ✓                     | x           |
| Sanger, 2006 (58)    | Upper extremity      | -Control of voluntary movement function<br>-Hand and arm use             | -3D motion capture system          | Measure of variability:<br>*Signal-to-noise ratio (ratio of first principal component of the joint velocity time serie to the sum of the remaining 10 components)<br>Measure of trajectory:<br>*Index of curvature<br>*Mean jerk during finger-to-nose task                                                                                                                                                                             | x                     | x     | ✓              | ✓                     | x                     | x           |
| Malfait, 2007 (59)   | Upper extremity      | -Control of voluntary movement function<br>-Hand and arm use             | -3D motion capture system<br>-sEMG | - Average co-contraction over flexion/extension (finger-to-nose):<br>*Dot product of the sEMG between biceps/triceps<br>*Minimum value of sEMG between biceps/triceps<br>-EMG activation levels during each phases<br>-Duration of whole movement circle<br>-Duration of phases:<br>*Acceleration/deceleration<br>*Pause<br>-Maximum flexion/extension velocity<br>-Maximum elbow rotation<br>-Coefficient of variation of each measure | II-V                  | x     | ✓              | ✓                     | x                     | x           |

Table 3 (continued):

| First author, year                     | Assessed body region | Assessed ICF-CY categories                                                                     | Instruments / Technologies                      | Measured parameters                                                                                                                                                                                                                                                                                                                        | GMFCS amb. / non amb. | MACS  | Comparison     |                       | Pre/post inter-vention | Reliability |
|----------------------------------------|----------------------|------------------------------------------------------------------------------------------------|-------------------------------------------------|--------------------------------------------------------------------------------------------------------------------------------------------------------------------------------------------------------------------------------------------------------------------------------------------------------------------------------------------|-----------------------|-------|----------------|-----------------------|------------------------|-------------|
|                                        |                      |                                                                                                |                                                 |                                                                                                                                                                                                                                                                                                                                            |                       |       | between groups | with clinical measure |                        |             |
| Pons, 2017 (60)                        | Upper extremity      | -Control of voluntary movement function<br>-Involuntary movement function<br>-Hand and arm use | -3D motion capture system                       | -Index of dystonia (kinematic measure of overflow) during 'drinking' task<br>-Target accuracy (reach-and-point task):<br>*Hold distance<br>*End point error<br>During 5 functional upper extremity tasks and 4 reach-to-graps tasks:<br>*Movement duration<br>*Average and maximum linear velocity<br>*Index of curvature<br>*Joint angles | I-IV                  | I-III | ✓              | ✓                     | ✗                      | ✗           |
| Kawamura, 2012 (61)                    | Upper extremity      | -Involuntary movement function                                                                 | -3D motion capture system                       | -Kinematic dystonia measure (kinematic overflow: summation of joint angle movement of wrist, elbow and shoulder)                                                                                                                                                                                                                           | I-V                   | I-IV  | ✓              | ✓                     | ✗                      | ✓           |
| Legros, 2004 (62)                      | Upper extremity      | -Involuntary movement function                                                                 | -Three-axis piezoceramic accelerometer          | -Integral/area under the curve of acceleration power spectrum during rest and posture                                                                                                                                                                                                                                                      | ✗                     | ✗     | ✓              | ✓                     | ✓                      | ✓           |
| Sanger, 2007 (63)                      | Upper extremity      | -Control of voluntary movement function<br>-Hand and arm use                                   | -Shape Tape                                     | -Maximal velocity of outward reaching                                                                                                                                                                                                                                                                                                      | ✗                     | ✗     | ✗              | ✗                     | ✓                      | ✗           |
| Liyangamage, 2017 (64)                 | Upper extremity      | -Control of voluntary movement function                                                        | -sEMG                                           | -Movement time<br>-Throughput (ratio of index of difficulty to movement time calculated by Fitts' Law)<br>-Muscle use (ratio of EMG in the vibrated muscle to non-vibrated muscle)                                                                                                                                                         | ✗                     | ✗     | ✓              | ✗                     | ✓                      | ✗           |
| Nwaobi, 1987 (65)<br>Nwaobi, 1987 (66) | Upper extremity      | -Control of voluntary movement function<br>-Hand and arm use                                   | -sEMG<br>-Touch activated switch                | -Movement time<br>-sEMG activity                                                                                                                                                                                                                                                                                                           | ✗                     | ✗     | ✗              | ✗                     | ✓                      | ✓           |
| Sanger, 2005 (67)                      | Upper extremity      | -Control of voluntary movement function<br>-Hand and arm use                                   | -Touch activated switch (three different sizes) | -Movement time<br>-Slope of regression lines of movement time on the logarithm of button width (Fitt's law)<br>-Slope of regression lines of speed on button width<br>-Slope and intercept of regression lines of log variance on log mean speed                                                                                           | ✗                     | ✗     | ✓              | ✗                     | ✗                      | ✗           |

**Table 3 (continued):**

| First author, year                                       | Assessed body region      | Assessed ICF-CY categories                                                | Instruments / Technologies                                                                                         | Measured parameters                                                                                                                                                                                                                                                                         | GMFCS amb. / non amb. | MACS | Comparison     |                       | Pre/post inter-vention | Reliability |
|----------------------------------------------------------|---------------------------|---------------------------------------------------------------------------|--------------------------------------------------------------------------------------------------------------------|---------------------------------------------------------------------------------------------------------------------------------------------------------------------------------------------------------------------------------------------------------------------------------------------|-----------------------|------|----------------|-----------------------|------------------------|-------------|
|                                                          |                           |                                                                           |                                                                                                                    |                                                                                                                                                                                                                                                                                             |                       |      | between groups | with clinical measure |                        |             |
| Rabhi, 2018 (68)                                         | Upper extremity           | -Control of voluntary movement function<br>-Moving around using equipment | -Virtual environment simulating the wheelchair navigation                                                          | -Performance indices of user's path (path length, performance time, speed, number/duration of collisions, number of stops, succesfully passed targed points<br>-Performance indices from joystick (average amplitude, average speed)                                                        | V                     | x    | x              | x                     | x                      | x           |
| Bertucco, 2014 (69)<br>Bertucco, 2015 (70)               | Upper extremity / fingers | -Control of voluntary movement function<br>-Fine hand use                 | -Touchscreen tablet<br>-Custom made app – game to assess tradeoff between movement time and accuracy (Fitt's Law)) | -Success rate<br>-Movement time<br>- Intercept and slope of linear regression of movement time as function of Indices of Difficulties (Fitt's law)<br>-Index of performance (1/slope of regression)<br>-Throughput (ratio of index of difficulty to movement time calculated by Fitts' Law) | x                     | x    | ✓              | ✓                     | x                      | x           |
| Young, 2011 (71)<br>Young, 2013 (72)<br>Young, 2014 (73) | Upper extremity / fingers | -Control of voluntary movement function<br>-Involuntary movement function | -sEMG<br>-Software tracking a target by isometrically activating of intrinsic muscles                              | -Tracking error<br>-Overflow (EMG)                                                                                                                                                                                                                                                          | x                     | x    | ✓              | ✓                     | ✓                      | x           |
| Bhanpuri, 2015, (74)                                     | Upper extremity / fingers | -Control of voluntary movement function<br>-Involuntary movement function | -sEMG<br>-Software tracking a target by isometrically activating of intrinsic muscles                              | -Tracking error in step tracking task and continuous task<br>-Overflow (sEMG) error in step tracking task and continuous task                                                                                                                                                               | x                     | x    | x              | x                     | ✓                      | x           |
| Lunardini, 2016 (75)                                     | Upper extremity /fingers  | -Control of voluntary movement function<br>-Fine hand use                 | -3D motion capture system<br>-sEMG                                                                                 | -Accuracy error<br>-Speed<br>-Task correlation index (relative contribution of muscle activity correlated with 8-figure task)                                                                                                                                                               | x                     | x    | x              | x                     | ✓                      | x           |
| Bertucco, 2019, (76)                                     | Upper extremity /fingers  | -Control of voluntary movement function<br>-Fine hand use                 | -Touchscreen tablet<br>-sEMG                                                                                       | -Accuracy error<br>-Speed<br>-Ratio between error and speed<br>-Spatial variability<br>-Temporal variability<br>-Task correlation index (relative contribution of muscle activity correlated with 8-figure task)                                                                            | x                     | x    | ✓              | x                     | ✓                      | x           |

Table 3 (continued):

| First author, year    | Assessed body region             | Assessed ICF-CY categories                                                                   | Instruments / Technologies                                                                                                                                                                                                           | Measured parameters                                                                                                                                                                                                                                                                                                                                                                                                              | GMFCS amb. / non amb. | MACS | Comparison     |                       | Pre/post inter-vention | Reliability |
|-----------------------|----------------------------------|----------------------------------------------------------------------------------------------|--------------------------------------------------------------------------------------------------------------------------------------------------------------------------------------------------------------------------------------|----------------------------------------------------------------------------------------------------------------------------------------------------------------------------------------------------------------------------------------------------------------------------------------------------------------------------------------------------------------------------------------------------------------------------------|-----------------------|------|----------------|-----------------------|------------------------|-------------|
|                       |                                  |                                                                                              |                                                                                                                                                                                                                                      |                                                                                                                                                                                                                                                                                                                                                                                                                                  |                       |      | between groups | with clinical measure |                        |             |
| Choi, 2011 (77)       | Upper extremity /fingers         | -Control of voluntary movement function<br>-Fine hand use                                    | -Virtual handwriting training system, with PC connected to a haptic device that can provide force feedback                                                                                                                           | -Segmented movement time of transition and stroke-drawing<br>-Total movement time<br>-Time on-paper/Time in-air<br>-Deviation of written trajectory from the ideal path                                                                                                                                                                                                                                                          | ✗                     | ✗    | ✗              | ✗                     | ✗                      | ✗           |
| Nicholson, 2001 (78)  | Trunk<br>Upper extremity         | -Control of voluntary movement function<br>-Hand and arm use                                 | -3D motion capture system                                                                                                                                                                                                            | -Proximal stability at the trunk and distal stability at the wrist and hand<br>-Variation in movements between attempts of a particular body part during reaching task in particular plane<br>-Smoothness trajectory of reach (visual comparison to normative data)                                                                                                                                                              | ✗                     | ✗    | ✗              | ✗                     | ✗                      | ✗           |
| Garavaglia, 2017 (79) | Trunk<br>Upper extremity         | -Control of voluntary movement function<br>-Hand and arm use<br>-Maintaining a body position | -3D motion capture system                                                                                                                                                                                                            | -Joint angles (thorax, shoulder, elbow, wrist)<br>Fingernail position                                                                                                                                                                                                                                                                                                                                                            | ✗                     | ✗    | ✗              | ✗                     | ✗                      | ✗           |
| Cimolin, 2009 (80)    | Trunk<br>Head<br>Upper extremity | -Involuntary movement function<br>-Maintaining a body position                               | -3D motion capture system<br>-System for acquisition of pressure distribution placed on the seatback and on headback of adaptive seating system                                                                                      | -Trajectories of markers of head and trunk: Difference between initial position and end position after extensor thrust<br>-Initial position in anterior and vertical direction<br>-ROM of head, trunk and upper limb (difference between initial position and maximum valued during extensor thrust)<br>-Average jerk (smoothness of movement) extensor thrust<br>-Peak of force on seatback and headpack during extensor thrust | ✓                     | ✗    | ✗              | ✗                     | ✓                      | ✗           |
| Man, 2007 (81)        | Head                             | - Control of voluntary movement function                                                     | -Camera Mouse<br>-Head-mouse emulator switch<br>-Cross scanner (i.e. mouse-like pointer interface software) activated by eye movement;<br>-Eye Gaze tracker<br>-Software: Point and-click test, based on the principle of Fitt's Law | -Movement time<br>-Accuracy rate                                                                                                                                                                                                                                                                                                                                                                                                 | ✗                     | ✗    | ✗              | ✗                     | ✗                      | ✗           |

**Table 3 (continued):**

| First author, year  | Assessed body region | Assessed ICF-CY categories                                     | Instruments / Technologies                                                | Measured parameters                                                                                                          | GMFCS amb. / non amb. | MACS | Comparison |   | Pre/post inter-vention | Reliability |
|---------------------|----------------------|----------------------------------------------------------------|---------------------------------------------------------------------------|------------------------------------------------------------------------------------------------------------------------------|-----------------------|------|------------|---|------------------------|-------------|
|                     |                      |                                                                |                                                                           |                                                                                                                              |                       |      |            |   |                        |             |
| Raya, 2010 (82)     | Head                 | -Involuntary movement function                                 | -Inertial sensor<br>-Software to control mouse pointer by inertial sensor | -Amplitude and frequency of movement<br>-Power spectral density versus time<br>-Standard deviations of angular head velocity | V                     | ✘    | ✘          | ✘ | ✘                      | ✘           |
| Saavedra, 2010 (83) | Head                 | -Involuntary movement function<br>-Maintaining a body position | -3D motion capture system                                                 | -Head movement (sway parameters in sagittal and frontal plane)<br>-Head displacement (RMS) with eyes closed and open         | I-III                 | ✘    | ✓          | ✘ | ✘                      | ✘           |
| Yamamoto, 2019 (84) | Head                 | -Involuntary movement function<br>-Maintaining a body position | -2D motion capture system                                                 | -Head segment angle (side-bending)<br>-Head angular velocity                                                                 | V                     | V    | ✘          | ✘ | ✘                      | ✘           |

sEMG=surface electromyography; DOF=Degree of freedom; ROM=Range of Motion; OGV= Overall Gait Variability Measure; MVC=maximum voluntary contraction; PULMI)=Peadiatric Upper Limb Motion Index ; %=percentage; RMS=Root mean amb=ambulatory; non amb.=non ambulatory; GMFCS=Gross motor functioning classification system; MACS=Manual Ability Classification System

✘ = information not available; ✓ = information available;
